# Supplementary material
Source: PubMed Central journal article supplement (PMC5820728)
Supplement: jamainternmed-177-1808-s001.pdf [file jamainternmed-177-1808-s001.pdf]

## Supplementary Online Content

Haw JS, Galaviz KI, Straus AN, et al. Long-term sustainability of diabetes prevention: a meta-analysis of randomized clinical trials. *JAMA Intern Med*. Published online November 6, 2017. doi:10.1001/jamainternmed.2017.6040

**eTable 1.** Search Terms and Combination MeSH Terms Used

**eTable 2.** Characteristics of Included and Analyzed Studies

**eFigure 1.** Meta-Regression Examining the Influence of Weight Lost on Diabetes Risk Among Studies Reporting This Outcome

**eFigure 2.** Funnel Plot Exploring Publication Bias

This supplementary material has been provided by the authors to give readers additional information about their work.

**eTable 1. Search Terms and Combination MeSH Terms Used**

| <b>Search Terms</b>         | <b>Combinations</b>                           | <b>Filters</b>         |
|-----------------------------|-----------------------------------------------|------------------------|
| diabetes prevention,        | “Prediabetes” OR                              | 18+ years              |
| impaired glucose tolerance, | “Pre diabetes” OR                             | Clinical trials        |
| glucose intolerance,        | “Impaired glucose tolerance”<br>OR            | Humans                 |
| impaired fasting glucose,   | “impaired” AND “fasting” AND<br>“glucose” OR  | Publication year 1990+ |
| prediabetic state,          | “diabetes” OR                                 |                        |
| prediabetes,                | “diabetes” AND “mellitus” AND<br>“type 2” AND |                        |
| diabetes mellitus type 2,   | “prevention” OR                               |                        |
| type 2 diabetes mellitus,   | “disease” AND “prevention”<br>OR              |                        |
| prevention,                 | “risk” OR                                     |                        |
| primary prevention,         | “risk” AND “reduction”                        |                        |
| disease prevention,         | NOT gestational                               |                        |
| risk reduction,             |                                               |                        |
| risk reduction behavior.    |                                               |                        |

**eTable 2. Characteristics of Included and Analyzed Studies**

| Author (Year) Trial, Country                   | Sample Analyzed                            | BMI kg/m <sup>2</sup> (baseline*) | % Male (baseline*) | Median** Follow up | Intervention/Drug Tested and Maintenance/Washout Duration                                                                                                                                                                                                               | DM Diagnostic Criteria | Quality category (score)*** |
|------------------------------------------------|--------------------------------------------|-----------------------------------|--------------------|--------------------|-------------------------------------------------------------------------------------------------------------------------------------------------------------------------------------------------------------------------------------------------------------------------|------------------------|-----------------------------|
| <b>LIFESTYLE STUDIES</b>                       |                                            |                                   |                    |                    |                                                                                                                                                                                                                                                                         |                        |                             |
| Lindstrom, (2013) <sup>1</sup><br>DPS, Finland | n = 366 with IGT                           | 31                                | 33%                | 9 years            | Intervention group met regularly to receive counseling from nutritionist to achieve ≥ 5% weight loss, moderate intensity physical activity ≥ 30 min/day, and fat < 30% of total calories. Control group received lifestyle and diabetes information in one session.     | WHO 1985               | Medium (6)                  |
| Wong (2013) <sup>2</sup><br>China              | n = 104 with IGT or IFG                    | 25.9                              | 93%                | 2 years [max]      | Treatment group received text message information about diabetes, lifestyle modification, and encouragement. Control group received usual care. Participants in both groups were given information booklets on pre-diabetes, diabetes, and health behavior information. | WHO 2006               | Medium (6)                  |
| Xu (2013) <sup>3</sup><br>China                | n = 81 with IGT or IFG                     | 26.3                              | 48%                | 1 year [max]       | Treatment group received coaching on low-glycemic foods and exercise and daily low-glycemic meal replacement for first 3 months of the study and monthly follow-up visits thereafter. Control group received one counseling session at baseline.                        | ADA 2003               | Medium (6)                  |
| Gagnon (2011) <sup>4</sup><br>Canada           | n = 48 with IGT or IFG                     | 35.1                              | 46%                | 1 year [max]       | Group one met individually with nurse, dietitian, and endocrinologist; in group seminars received diet, exercise, and weight loss counseling. Group two was offered group seminars only.                                                                                | WHO 1999               | Medium (4)                  |
| Moore (2011) <sup>5</sup><br>Australia         | n = 274 with IGT or IFG                    | 29.7                              | 41%                | 0.5 years [max]    | Intervention group received pre-course individual session then 6 educational group sessions based on behavior change. Control group received intervention after 6 months of usual care.                                                                                 | WHO 1985               | Medium (5)                  |
| Saito (2011) <sup>6</sup><br>Japan             | n = 621 total with IFG+IGT or isolated IFG | 27.0                              | 71%                | 3 years [max]      | Frequent intervention group received individual diet and exercise coaching at least 9 times in 36 months from medical professionals. Control group received similar coaching once a year for 3 years                                                                    | WHO 2006               | Medium (5)                  |
| Sakane (2011) <sup>7</sup><br>Japan            | n = 213 with IGT                           | 24.5                              | 50%                | 3 years [max]      | Treatment group received diabetes, diet and exercise counseling in 4 group meetings over 6 months and biannual individual follow-up meetings over 3 years. Control group attended one group session on                                                                  | WHO 2006               | Low (3)                     |

|                                                                               |                           |      |      |                  |                                                                                                                                                                                                                                                                                                                                                                                                                                                                                                                      |              |            |
|-------------------------------------------------------------------------------|---------------------------|------|------|------------------|----------------------------------------------------------------------------------------------------------------------------------------------------------------------------------------------------------------------------------------------------------------------------------------------------------------------------------------------------------------------------------------------------------------------------------------------------------------------------------------------------------------------|--------------|------------|
|                                                                               |                           |      |      |                  | healthy lifestyle.                                                                                                                                                                                                                                                                                                                                                                                                                                                                                                   |              |            |
| Zhou (2011) <sup>8</sup><br>China                                             | n = 117 with IGT or IFG   | 24.5 | 30%  | 0.5 years [max]  | Interventions included: 1) individualized diet plan controlling nutrients and total energy intake, adjusted once a month; 2) exercise program including walking, jogging, dancing and taichi, with five 40-minute sessions per week; 3) combined diet and exercise programs; 4) control group.                                                                                                                                                                                                                       | Not Reported | Low (3)    |
| Kang (2010) <sup>9</sup><br>South Korea                                       | n =85 with IFG            | 25.6 | 100% | 2 years [max]    | Face-to-face counseling based on the participant's health profiles for 12 weeks with email follow-up after primary intervention, focused on achievable diet and exercise goals for 2 years. Control group received usual care.                                                                                                                                                                                                                                                                                       | ADA 1997     | Medium (5) |
| Diabetes Prevention Program Research Group (2009) <sup>10</sup><br>DPPOS, USA | n = 1842 with IGT and IFG | 33.2 | 32%  | 10 years         | 10-year follow-up study of DPP. Participants in all groups were offered a group-administered version of the DPP 16-session lifestyle curriculum. Maintenance strategy/duration: lifestyle sessions (HELP) were offered every 3 months to reinforce 7% weight loss and 150+ min of physical activity/week for all. The lifestyle group was also offered two group classes (BOOST) each comprising four sessions every year. Participants in control group were also offered the group lifestyle modification program. | ADA 1997     | High (8)   |
| Penn (2009) <sup>11</sup><br>EDIPS, UK                                        | n = 102 with IGT          | 34   | 41%  | 3 years [max]    | Intervention group received individual advice from dietician and physiotherapist trained in motivational interviewing; individualized plan to decrease energy intake from carbs and fat, increase fiber and physical activity, and achieve normal BMI. Control group received standard health promotion advice.                                                                                                                                                                                                      | WHO 1999     | Medium (5) |
| Kawahara (2008) <sup>12</sup><br>Japan                                        | n = 285 with IGT          | 24.6 | 47%  | 3.1 years [mean] | Hospitalization group received exercise advice and individual diet plan during 1-3-day hospitalization. Education and support group received periodic counseling with clinicians about healthy lifestyle. Control group received usual care. Maintenance: individual counseling sessions every 3 months over three years                                                                                                                                                                                             | ADA 2003     | Medium (6) |
| Li (2008) <sup>13</sup><br>Da Qing, China                                     | n = 576 with IGT          | 25.8 | 54%  | 20 years [max]   | 20-yr follow-up of Da Qing Study. Diet group counseled on healthy diet and losing weight if overweight/obese. Exercise group individually counseled on increasing physical activity. Combined group received diet & exercise counseling. Control group received brochures about IGT and diabetes.                                                                                                                                                                                                                    | WHO 1985     | Medium (5) |
| Roumen (2008) <sup>14</sup><br>SLIM, Netherlands                              | n = 106 with IGT          | 29.4 | 51%  | 3 years [max]    | Intervention group received diet & exercise counseling from dietician for 60 minutes every 3 months. Encouraged to exercise 30 minutes/day, 5 days/week. Control group received brief information                                                                                                                                                                                                                                                                                                                    | WHO 1999     | Low (2)    |

|                                                                             |                           |              |      |                  |                                                                                                                                                                                                                                                                                                                                                                                                           |          |            |
|-----------------------------------------------------------------------------|---------------------------|--------------|------|------------------|-----------------------------------------------------------------------------------------------------------------------------------------------------------------------------------------------------------------------------------------------------------------------------------------------------------------------------------------------------------------------------------------------------------|----------|------------|
|                                                                             |                           |              |      |                  | about benefits of a healthy diet.                                                                                                                                                                                                                                                                                                                                                                         |          |            |
| Oldroyd (2006) <sup>15</sup><br>UK                                          | n = 54 with IGT           | Not Reported | 57%  | 2 years [max]    | Intervention group received regular counseling from a dietician and physiotherapist using the stages-of-change model of behavior change. Control group instructed to maintain pre-study habits.                                                                                                                                                                                                           | WHO 1985 | Medium (5) |
| Ramachandran (2006) <sup>16</sup><br>IDPP, India                            | n = 253 with IGT          | 26.0         | 77%  | 2.5 years        | Lifestyle modification group encouraged to exercise 30 min/day and improve diet during monthly phone calls and in person every six months. Control group received usual care.                                                                                                                                                                                                                             | WHO 1999 | Medium (5) |
| Kosaka (2005) <sup>17</sup><br>Japan                                        | n = 458 with IGT          | 23.8         | 100% | 4 years [max]    | Intensive intervention group counseled to achieve BMI < 22.0 with diet and exercise at hospital visit every 3-4 months. Control group advised to maintain BMI < 24.0 at hospital visit every 6 months.                                                                                                                                                                                                    | WHO 1985 | Medium (4) |
| Diabetes Prevention Program Research Group (2002) <sup>18</sup><br>DPP, USA | n = 2161 with IGT and IFG | 34.0         | 32%  | 2.8 years [mean] | Lifestyle modification program contained 16 individual counselling sessions on diet, exercise, and behavior modification over 24 weeks. Goals were 7% weight loss and ≥150 min physical activity per week. Maintenance: subsequent individual sessions (usually monthly) and group sessions. Control group received a placebo tablet twice daily.                                                         | ADA 1997 | High (8)   |
| Liao (2002) <sup>19</sup><br>USA                                            | n = 58 with IGT           | 26.1         | 45%  | 2 years [max]    | Treatment group received endurance exercise training and advised to maintain isocaloric American Heart Association step 2 diet. Control group performed stretching exercises three weekly for 1 h and were prescribed an isocaloric American Heart Association step 1 diet.                                                                                                                               | WHO 1999 | Medium (4) |
| Swinburn (2001) <sup>20</sup><br>New Zealand                                | n = 103 with IGT          | 29.1         | 74%  | 5 years [max]    | Treatment group received education about reducing fat intake at monthly group meetings for 1 year. Control group maintained normal diet.                                                                                                                                                                                                                                                                  | WHO 1999 | Low (2)    |
| Tuomilehto (2001) <sup>21</sup><br>DPS, Finland                             | n = 522 with IGT          | 31           | 33%  | 6 years [max]    | 7 one-one one counselling in year 1, then every three months up to year 6 plus optional group classes. Intervention group received counseling from nutritionist to achieve ≥ 5% weight loss, moderate intensity physical activity ≥ 30 min/day, and fat < 30% of total calories. Control group received lifestyle and diabetes information in one session.                                                | WHO 1985 | Medium (6) |
| Pan (1997) <sup>22</sup><br>Da Qing, China                                  | n = 530 with IGT          | 25.8         | 50%  | 6 years [max]    | Diet group counseled by physicians on healthy diet and losing weight if overweight/obese. Exercise group individually counseled on increasing leisure physical activity. Combined treatment group received diet & exercise counseling, similar to those described above. All groups met weekly for one month, monthly for 3 months, then every 3 months for duration of the study. Control group received | WHO 1985 | Medium (5) |

|  |  |  |  |  |                                   |  |  |
|--|--|--|--|--|-----------------------------------|--|--|
|  |  |  |  |  | brochures about IGT and diabetes. |  |  |
|--|--|--|--|--|-----------------------------------|--|--|

| MEDICATION STUDIES                                                          |                              |      |     |               |                                                                                                                                                                                                                                                                                                                                       |              |            |
|-----------------------------------------------------------------------------|------------------------------|------|-----|---------------|---------------------------------------------------------------------------------------------------------------------------------------------------------------------------------------------------------------------------------------------------------------------------------------------------------------------------------------|--------------|------------|
| Garvey (2014) <sup>23</sup><br>SEQUEL, USA                                  | n = 315 with IGT or IFG      | 36.2 | 35% | 1 year        | Treatment groups received phentermine/topiramate 7.5/46 or phentermine/topiramate 15/92 once daily. Control group received once daily placebo. Lifestyle modification counseling based on the LEARN (lifestyle, exercise, attitudes, relationships, and nutrition) program for all participants.                                      | WHO 1999     | High (7)   |
| Kataoka (2012) <sup>24</sup><br>DIANA, Japan                                | n = 175 with IGT             | 24.3 | 86% | 1 year [max]  | Treatment group took nateglinide 60 mg 3 times daily or voglibose 0.3mg 3 times daily. Control group did not take placebo. All participants were encouraged to start a low-calorie diet and mild to moderate exercise.                                                                                                                | WHO 1999     | High (7)   |
| ORIGIN Trial Investigators (2012) <sup>25</sup><br>ORIGIN                   | n = 1452 with IFG or IGT     | 29.9 | 65% | 6.2 years     | In a 2x2 factorial design, participants received insulin glargine or standard care <i>and</i> n-3 fatty acids or placebo. Washout duration: 14 weeks                                                                                                                                                                                  | Not Reported | Medium (6) |
| Barzilay (2011) <sup>26</sup><br>TRANSCEND                                  | n = 1561 with IFG and/or IGT | 27.6 | 61% | 4.7 years     | Treatment group received telmisartan 80 mg daily. Control group received placebo.                                                                                                                                                                                                                                                     | WHO 1999     | High (7)   |
| DeFronzo (2011) <sup>27</sup><br>USA                                        | n = 441 with IGT             | 33.7 | 48% | 2.4 years     | Treatment group received pioglitazone 30 mg once daily for first month, then 45 mg per day. Control group received placebo. All participants received 30 minutes of DPP instruction from dietician or nurse, with emphasis on decreased total caloric intake, decreased fat intake, and walking 30 minutes per day 4-5 days per week. | ADA 2003     | Medium (5) |
| Lu (2011) <sup>28</sup><br>China                                            | n = 181 with IGT or IFG      | 27.0 | 53% | 2 years [max] | Intervention participants with IGT received acarbose 50 mg 3 times daily; those with IFG received metformin 250 mg 3 times daily. All intervention participants received lifestyle coaching in person every 3 months and by phone monthly. Control group received basic education and usual care.                                     | ADA 2003     | Low (3)    |
| The NAVIGATOR Study Group (2010) <sup>29</sup><br>NAVIGATOR valsartan trial | n = 9306 with IGT            | 30.5 | 49% | 5 years       | In 2x2 factorial design, patients took valsartan 160 mg once daily or placebo <i>with/without</i> nateglinide up to 60 mg three times daily and/or placebo. All subjects participated in a clinic-based and telephone-based lifestyle modification program.                                                                           | WHO 1999     | High (7)   |
| The NAVIGATOR Study Group (2010) <sup>30</sup><br>NAVIGATOR                 | n = 9306 with IGT            | 30.5 | 49% | 5 years       | In 2x2 factorial design, patients took nateglinide 160 mg once daily or placebo <i>with/without</i> valsartan up to 60 mg three times daily and/or placebo. All subjects participated in a clinic-based and telephone-based lifestyle modification program.                                                                           | WHO 1999     | High (7)   |

|                   |  |  |  |  |  |  |  |
|-------------------|--|--|--|--|--|--|--|
| nateglinide trial |  |  |  |  |  |  |  |
|-------------------|--|--|--|--|--|--|--|

|                                                                               |                              |      |     |                 |                                                                                                                                                                                                                                 |                    |            |
|-------------------------------------------------------------------------------|------------------------------|------|-----|-----------------|---------------------------------------------------------------------------------------------------------------------------------------------------------------------------------------------------------------------------------|--------------------|------------|
| Zinman (2010) <sup>31</sup><br>CANOE, Canada                                  | n = 207 with IGT             | 31.7 | 33% | 3.9 years       | All patients participated in one-on-one lifestyle coaching in first year and received educational materials thereafter. Treatment received Metformin 500 mg and rosiglitazone 2 mg twice daily. Control group received placebo. | WHO 2006           | High (7)   |
| Diabetes Prevention Program Research Group (2009) <sup>10</sup><br>DPPOS, USA | n = 1856 with IGT and IFG    | 32.1 | 32% | 10 years        | 10-year follow-up study of DPP. Participants in all groups were offered a group-administered version of the 16-session lifestyle curriculum. Metformin group continued 850mg twice daily.                                       | ADA 1997           | High (8)   |
| Kawamori (2009) <sup>32</sup><br>Japan                                        | n = 1778 with IGT            | 25.8 | 60% | 3 years         | Intervention group received voglibose 0.2 mg three times daily. Control group received placebo. Voglibose and control groups both received individual counseling on healthy diet and exercise.                                  | WHO 1999           | High (7)   |
| Nijpels (2008) <sup>33</sup><br>DAISI, Netherlands                            | n = 118 with IGT             | 28.9 | 50% | 3 years [max]   | Treatment group received acarbose, titrated up to max of 50 mg three times daily. Control group received placebo.                                                                                                               | WHO 1985, WHO 1999 | Medium (5) |
| DREAM Trial Investigators, (2006 and 2011) <sup>34,35</sup><br>DREAM          | n = 5269 with IFG and/or IGT | 30.9 | 41% | 3 years         | Treatment group received rosiglitazone 8 mg daily (titrated up from 4 mg daily). Control group received placebo. Washout duration: 10 weeks                                                                                     | WHO 1999           | High (7)   |
| DREAM Trial Investigators (2006 and 2011) <sup>35,36</sup><br>DREAM           | n = 5269 with IFG and/or IGT | 30.9 | 41% | 3 years         | In a 2x2 factorial design, participants received ramipril 15 mg daily (titrated up from 5 mg daily) or placebo <i>and</i> rosiglitazone or placebo. Washout duration: 10 weeks                                                  | WHO 1999           | High (7)   |
| Eriksson (2006) <sup>37</sup><br>Botnia study, Finland                        | n = 34 with IGT              | 28.3 | 56% | 1.5 years [max] | Treatment group received glipizide 2.5 mg daily for 6 months. Control group received placebo. Washout duration: 52 weeks                                                                                                        | WHO 1999           | Medium (4) |
| Ramachandran (2006) <sup>16</sup><br>IDPP, India                              | n = 261 with IGT             | 25.9 | 78% | 2.5 years       | Metformin group received 250 mg Metformin twice daily. Control group received usual care.                                                                                                                                       | WHO 1999           | Medium (5) |



|                                                                                                     |                                                                  |                                                                                                                                                                                                                                                                                                                     |     |                     |                                                                                                                                                                                                                                                    |                               |            |
|-----------------------------------------------------------------------------------------------------|------------------------------------------------------------------|---------------------------------------------------------------------------------------------------------------------------------------------------------------------------------------------------------------------------------------------------------------------------------------------------------------------|-----|---------------------|----------------------------------------------------------------------------------------------------------------------------------------------------------------------------------------------------------------------------------------------------|-------------------------------|------------|
| Tenenbaum (2005) <sup>38</sup><br>BIP, Israel                                                       | n = 339                                                          | 32.4                                                                                                                                                                                                                                                                                                                | 85% | 6.3 years<br>[mean] | All participants received standard lipid-lowering dietary advice in three 15-minute interventions. Treatment group received bezafibrate 400 mg once daily. Control received placebo.                                                               | ADA<br>1997                   | Medium (4) |
| Torgerson (2004) <sup>39</sup><br>XENDOS, Sweden                                                    | n = 3277 with BMI ≥ 30 and IGT                                   | 37.3                                                                                                                                                                                                                                                                                                                | 45% | 4 years<br>[max]    | All participants were prescribed a reduced-calorie diet (800 kcal/day deficit) and received dietary counseling. Encouraged to walk at least 1 extra kilometer per day. Treatment group received orlistat 120 mg with breakfast, lunch, and dinner. | 2hr<br>OGTT ≥<br>10<br>mmol/L | Medium (6) |
| Kanaya (2003) <sup>40</sup><br>HERS, USA                                                            | n = 218 with IFG                                                 | 28.7                                                                                                                                                                                                                                                                                                                | 0%  | 4.1 years<br>[mean] | Treatment group received 0.625 mg of conjugated estrogen plus 2.5 mg of medroxyprogesterone acetate daily. Control group received placebo.                                                                                                         | ADA<br>1997                   | High (8)   |
| Chiasson (2002) <sup>41</sup><br>STOP-NIDDM                                                         | n = 1368 with IGT                                                | 30.9                                                                                                                                                                                                                                                                                                                | 49% | 3.3 years<br>[mean] | All participants received weight loss counseling from dietician yearly. Treatment group received acarbose 50-100 mg 3 times per day with meals (mean dose 194 mg, SD 87 mg). Control group received placebo. Washout duration: 12 weeks            | WHO<br>1985                   | Medium (6) |
| Diabetes<br>Prevention<br>Program Research<br>Group (2002 and<br>2003) <sup>18,42</sup><br>DPP, USA | n = 2155 with IGT and IFG                                        | 34.0                                                                                                                                                                                                                                                                                                                | 32% | 2.8 years<br>[mean] | Metformin group received 850 mg twice daily. Control group received placebo. Washout duration: 2 weeks                                                                                                                                             | ADA<br>1997                   | High (8)   |
| Li (1999) <sup>43</sup><br>China                                                                    | n = 70 with IGT                                                  | 26.2                                                                                                                                                                                                                                                                                                                | 71% | 1 year<br>[max]     | Patient education on healthy diet and exercise and diabetes prevention was provided every three months to all participants. Treatment group received metformin 250mg 3 times daily for 6 months. Control group received placebo.                   | WHO<br>1995                   | Medium (5) |
| <b>STUDIES NOT INCLUDED IN META-ANALYSES (n=10)</b>                                                 |                                                                  |                                                                                                                                                                                                                                                                                                                     |     |                     |                                                                                                                                                                                                                                                    |                               |            |
| Perreault (2012) <sup>44</sup><br>DPPOS, USA                                                        | n = 1990 with IGT and IFG                                        | Lifestyle group goal to achieve 7% weight loss and 150+ min physical activity/week through group lifestyle coaching. Metformin group received 850mg twice daily. Placebo group received placebo twice daily.                                                                                                        |     |                     | ADA 2003                                                                                                                                                                                                                                           |                               | Low (3)    |
| Mason (2011) <sup>45</sup><br>USA                                                                   | n = 439<br>postmenopausal<br>women with BMI ≥<br>25.0 and/or IFG | Exercise group exercised 3 days/week with supervision and 2 days/week at home. Diet group received individual coaching from dietician, met in groups weekly to achieve diet of 1,200-2,000 kcal/day, < 30% calories from fat. Exercise + diet group received both interventions. Control group received usual care. |     |                     | N/A                                                                                                                                                                                                                                                |                               | Medium (5) |

|                                                                                      |                              |                                                                                                                                                                                                                                                                                                                                                                                                                 |                     |            |
|--------------------------------------------------------------------------------------|------------------------------|-----------------------------------------------------------------------------------------------------------------------------------------------------------------------------------------------------------------------------------------------------------------------------------------------------------------------------------------------------------------------------------------------------------------|---------------------|------------|
| Lindstrom (2006) <sup>46</sup><br>DPS, Finland                                       | n = 475 with IGT             | 7-yr follow-up of DPS. Intervention group met regularly to receive counseling from nutritionist to achieve ≥ 5% weight loss, moderate intensity physical activity ≥ 30 min/day, and fat < 30% of total calories. Control group received lifestyle and diabetes information once. Post-intervention follow-up: all participants had yearly visits with study nurse without specific diet or exercise counseling. | WHO 1985            | Medium (6) |
| Ebbesson (2005) <sup>47</sup><br>USA                                                 | n = 454 Eskimos              | Intervention participants received four 30-60 minute counseling sessions over 3 years that encouraged more traditional foods, fewer processed foods, and more physical activity. Control group one personal counseling session.                                                                                                                                                                                 | WHO 1985            | Low (2)    |
| Diabetes<br>Prevention<br>Program Research<br>Group (2005) <sup>48</sup><br>DPP, USA | n = 2343 with IGT and<br>IFG | Treatment group received troglitazone 400 mg once daily. Other treatment groups received metformin 850 mg twice daily, intensive lifestyle intervention, or placebo.                                                                                                                                                                                                                                            | WHO 1985 & ADA 1997 | Medium (4) |
| Lindstrom (2003) <sup>49</sup><br>DPS, Finland                                       | n = 522 with IGT             | Intervention group met regularly to receive counseling from nutritionist to achieve ≥ 5% weight loss, moderate intensity physical activity ≥ 30 min/day, and fat < 30% of total calories. Control group received lifestyle and diabetes information in one session.                                                                                                                                             | WHO 1985            | Medium (6) |
| Lindstrom (2003) <sup>50</sup><br>DPS, Finland                                       | n = 522 with IGT             | Intervention group met regularly to receive counseling from nutritionist to achieve ≥ 5% weight loss, moderate intensity physical activity ≥ 30 min/day, and fat < 30% of total calories. Control group received lifestyle and diabetes information in one session.                                                                                                                                             | WHO 1985            | Medium (6) |
| Li (2002) <sup>51</sup><br>DA Qing, China                                            | n = 284 with IGT             | Diet group counseled on healthy diet and losing weight if overweight/obese. Exercise group individually counseled on increasing physical activity. Combined group received diet & exercise counseling. Control group received brochures about IGT and diabetes.                                                                                                                                                 | WHO 1985            | Medium (5) |
| Oldroyd (2001)<br>UK <sup>52</sup>                                                   | n = 67 with IGT              | Intervention group received regular counseling from a dietician and physiotherapist using the stages-of-change model of behavior change. Control group instructed to maintain pre-study habits.                                                                                                                                                                                                                 | WHO 1985            | Medium (5) |
| Rosenstock<br>(2010) <sup>53</sup><br>USA                                            | n = 151 with IFG or<br>IGT   | Exenatide group received 10 mcgs daily after 4-week 5 mcg daily initiation period and structured program of diet and physical activity through week 24. Control group received lifestyle education and placebo.                                                                                                                                                                                                 | WHO 2006            | Medium (5) |

\*Baseline BMI and % male include all participants enrolled at baseline

\*\*Median follow-up time reported, unless otherwise indicated. Follow-up time reported is corresponds to time point used in person-years estimate.

IGT= Impaired glucose tolerance; IFG= Impaired fasting glucose; Max = maximum years of follow-up; Mean = mean years of follow-up

\*\*\*A composite quality score was obtained by summing the scores across 4 quality indicators (blinding, attrition, analysis, and reporting). Studies scoring 0-3 points were classified as "low quality"; studies scoring 4-6 as medium quality; and studies scoring 7-8 as high quality.

**Trial abbreviations:** BIP, Bezafibrate Infarction Prevention Study; DPS, Diabetes Prevention Study; TLGS, Tehran Lipid and Glucose Study; DPPOS, Diabetes Prevention Program Outcomes Study; EDIPS, European Diabetes Prevention Study; SLIM, Study on lifestyle-intervention and impaired glucose tolerance Maastricht; IDPP, Indian Diabetes Prevention Programme; DPP, Diabetes Prevention Program; DIANA, DIAbetes and diffuse coronary NArrowing; ORIGIN, Outcome Reduction With Initial Glargine Intervention; TRANSCEND, Telmisartan Randomised Assessment Study in ACE iNtolerant subjects with cardiovascular Disease; NAVIGATOR, Nateglinide and Valsartan in Impaired Glucose Tolerance Outcomes Research; CANOE, CANadian Normoglycemia Outcomes Evaluation; DAISI, Dutch Acarbose Intervention Study in Impaired glucose tolerance; DREAM, DIAbetes REduction Assessment with ramipril and rosiglitazone Medication; ; HERS, Heart and Estrogen/Progestin Replacement Study; STOP-NIDDM, Study to Prevent NIDDM; XENDOS, Xenical in the Prevention of Diabetes in Obese Subjects; L-ARG, L-arginine trial.

## eReferences.

1. Lindstrom J, Peltonen M, Eriksson JG, et al. Improved lifestyle and decreased diabetes risk over 13 years: long-term follow-up of the randomised Finnish Diabetes Prevention Study (DPS). *Diabetologia*. 2013;56(2):284-293.
2. Wong CKH, Fung CSC, Siu SC, et al. A short message service (SMS) intervention to prevent diabetes in Chinese professional drivers with pre-diabetes: A pilot single-blinded randomized controlled trial. *Diabetes Research and Clinical Practice*. 2013;102(3):158-166.
3. Xu DF, Sun JQ, Chen M, et al. Effects of lifestyle intervention and meal replacement on glycaemic and body-weight control in Chinese subjects with impaired glucose regulation: a 1-year randomised controlled trial. *Br J Nutr*. 2013;109(3):487-492.
4. Gagnon C, Brown C, Couture C, et al. A cost-effective moderate-intensity interdisciplinary weight-management programme for individuals with prediabetes. *Diabetes and Metabolism*. 2011;37(5):410-418.
5. Moore SM, Hardie EA, Hackworth NJ, et al. Can the onset of type 2 diabetes be delayed by a group-based lifestyle intervention? A randomised control trial. *Psychology & health*. 2011;26(4):485-499.
6. Saito T, Watanabe M, Nishida J, et al. Lifestyle modification and prevention of type 2 diabetes in overweight Japanese with impaired fasting glucose levels: A randomized controlled trial. *Archives of Internal Medicine*. 2011;171(15):1352-1360.
7. Sakane N, Sato J, Tsushita K, et al. Prevention of type 2 diabetes in a primary healthcare setting: three-year results of lifestyle intervention in Japanese subjects with impaired glucose tolerance. *BMC Public Health*. 2011;11(1):40.
8. Zhou J. Life style interventions study on the effects of impaired glucose regulations in Shanghai urban communities. *Journal of hygiene research*. 2011;40(3):331-333.
9. Kang JY, Cho SW, Sung SH, Park YK, Paek YM, Choi TI. Effect of a continuous diabetes lifestyle intervention program on male workers in Korea. *Diabetes Research and Clinical Practice*. 2010;90(1):26-33.
10. Diabetes Prevention Program Research Group. 10-year follow-up of diabetes incidence and weight loss in the Diabetes Prevention Program Outcomes Study. *Lancet*. 2009;374(9702):1677-1686.
11. Penn L, White M, Oldroyd J, Walker M, Alberti KG, Mathers JC. Prevention of type 2 diabetes in adults with impaired glucose tolerance: the European Diabetes Prevention RCT in Newcastle upon Tyne, UK. *BMC Public Health*. 2009;9:342.
12. Kawahara T, Takahashi K, Inazu T, et al. Reduced progression to type 2 diabetes from impaired glucose tolerance after a 2-day in-hospital diabetes educational program: the Joetsu Diabetes Prevention Trial. *Diabetes Care*. 2008;31(10):1949-1954.
13. Li G, Zhang P, Wang J, et al. The long-term effect of lifestyle interventions to prevent diabetes in the China Da Qing Diabetes Prevention Study: a 20-year follow-up study. *Lancet*. 2008;371(9626):1783-1789.
14. Roumen C, Corpeleijn E, Feskens EJ, Mensink M, Saris WH, Blaak EE. Impact of 3-year lifestyle intervention on postprandial glucose metabolism: the SLIM study. *Diabet Med*. 2008;25(5):597-605.
15. Oldroyd JC, Unwin NC, White M, Mathers JC, Alberti KG. Randomised controlled trial evaluating lifestyle interventions in people with impaired glucose tolerance. *Diabetes Res Clin Pract*. 2006;72(2):117-127.
16. Ramachandran A, Snehalatha C, Mary S, et al. The Indian Diabetes Prevention Programme shows that lifestyle modification and metformin prevent type 2 diabetes in Asian Indian subjects with impaired glucose tolerance (IDPP-1). *Diabetologia*. 2006;49(2):289-297.

17. Kosaka K, Noda M, Kuzuya T. Prevention of type 2 diabetes by lifestyle intervention: A Japanese trial in IGT males. *Diabetes Research and Clinical Practice*. 2005;67(2):152-162.
18. Diabetes Prevention Program Research Group. Reduction in the incidence of type 2 diabetes with lifestyle intervention or metformin. *New England Journal of Medicine*. 2002;346(6):393-403.
19. Liao D, Asberry PJ, Shofer JB, et al. Improvement of BMI, body composition, and body fat distribution with lifestyle modification in Japanese Americans with impaired glucose tolerance. *Diabetes Care*. 2002;25(9):1504-1510.
20. Swinburn BA, Metcalf PA, Ley SJ. Long-term (5-year) effects of a reduced-fat diet intervention in individuals with glucose intolerance. *Diabetes Care*. 2001;24(4):619-624.
21. Tuomilehto J, Lindström J, Eriksson JG, et al. Prevention of Type 2 Diabetes Mellitus by Changes in Lifestyle among Subjects with Impaired Glucose Tolerance. *New England Journal of Medicine*. 2001;344(18):1343-1350.
22. Pan XR, Li GW, Hu YH, et al. Effects of diet and exercise in preventing NIDDM in people with impaired glucose tolerance. The Da Qing IGT and Diabetes Study. *Diabetes Care*. 1997;20(4):537-544.
23. Garvey WT, Ryan DH, Henry R, et al. Prevention of type 2 diabetes in subjects with prediabetes and metabolic syndrome treated with phentermine and topiramate extended release. *Diabetes Care*. 2014;37(4):912-921.
24. Kataoka Y, Yasuda S, Miyamoto Y, et al. Effects of voglibose and nateglinide on glycemic status and coronary atherosclerosis in early-stage diabetic patients. *Circ J*. 2012;76(3):712-720.
25. Origin Trial Investigators, Gerstein HC, Bosch J, et al. Basal insulin and cardiovascular and other outcomes in dysglycemia. *N Engl J Med*. 2012;367(4):319-328.
26. Barzilay JI, Gao P, Ryden L, et al. Effects of telmisartan on glucose levels in people at high risk for cardiovascular disease but free from diabetes: the TRANSCEND study. *Diabetes Care*. 2011;34(9):1902-1907.
27. DeFronzo RA, Tripathy D, Schwenke DC, et al. Pioglitazone for diabetes prevention in impaired glucose tolerance. *N Engl J Med*. 2011;364(12):1104-1115.
28. Lu YH, Lu JM, Wang SY, et al. Outcome of intensive integrated intervention in participants with impaired glucose regulation in China. *Adv Ther*. 2011;28(6):511-519.
29. NAVIGATOR Study Group. Effect of valsartan on the incidence of diabetes and cardiovascular events. *N Engl J Med*. 2010;362(16):1477-1490.
30. The NAVIGATOR Study Group. Effect of Nateglinide on the Incidence of Diabetes and Cardiovascular Events. *New England Journal of Medicine*. 2010;362(16):1463-1476.
31. Zinman B, Harris SB, Neuman J, et al. Low-dose combination therapy with rosiglitazone and metformin to prevent type 2 diabetes mellitus (CANOE trial): a double-blind randomised controlled study. *Lancet*. 2010;376(9735):103-111.
32. Kawamori R, Tajima N, Iwamoto Y, et al. Voglibose for prevention of type 2 diabetes mellitus: a randomised, double-blind trial in Japanese individuals with impaired glucose tolerance. *Lancet*. 2009;373(9675):1607-1614.

33. Nijpels G, Boorsma W, Dekker JM, Kostense PJ, Bouter LM, Heine RJ. A study of the effects of acarbose on glucose metabolism in patients predisposed to developing diabetes: the Dutch acarbose intervention study in persons with impaired glucose tolerance (DAISI). *Diabetes Metab Res Rev*. 2008;24(8):611-616.
34. The DREAM Trial Investigators. Effect of rosiglitazone on the frequency of diabetes in patients with impaired glucose tolerance or impaired fasting glucose: a randomised controlled trial. *Lancet*. 2006;368(9541):1096-1105.
35. The DREAM Trial Investigators. Incidence of diabetes following ramipril or rosiglitazone withdrawal. *Diabetes Care*. 2011;34(6):1265-1269.
36. The DREAM Trial Investigators. Effect of Ramipril on the Incidence of Diabetes. *New England Journal of Medicine*. 2006;355(15):1551-1562.
37. Eriksson JG, Lehtovirta M, Ehrnstrom B, Salmela S, Groop L. Long-term beneficial effects of glipizide treatment on glucose tolerance in subjects with impaired glucose tolerance. *Journal of internal medicine*. 2006;259(6):553-560.
38. Tenenbaum A, Motro M, Fisman EZ, et al. Effect of bezafibrate on incidence of type 2 diabetes mellitus in obese patients. *Eur Heart J*. 2005;26(19):2032-2038.
39. Torgerson JS, Hauptman J, Boldrin MN, Sjostrom L. XENical in the prevention of diabetes in obese subjects (XENDOS) study: a randomized study of orlistat as an adjunct to lifestyle changes for the prevention of type 2 diabetes in obese patients. *Diabetes Care*. 2004;27(1):155-161.
40. Kanaya AM, Herrington D, Vittinghoff E, et al. Glycemic effects of postmenopausal hormone therapy: the Heart and Estrogen/progestin Replacement Study. A randomized, double-blind, placebo-controlled trial. *Ann Intern Med*. 2003;138(1):1-9.
41. Chiasson JL, Josse RG, Gomis R, Hanefeld M, Karasik A, Laakso M. Acarbose for prevention of type 2 diabetes mellitus: the STOP-NIDDM randomised trial. *Lancet*. 2002;359(9323):2072-2077.
42. Diabetes Prevention Program Research Group. Effects of withdrawal from metformin on the development of diabetes in the diabetes prevention program. *Diabetes Care*. 2003;26(4):977-980.
43. Li CL, Pan CY, Lu JM, et al. Effect of metformin on patients with impaired glucose tolerance. *Diabet Med*. 1999;16(6):477-481.
44. Perreault L, Pan Q, Mather KJ, Watson KE, Hamman RF, Kahn SE. Regression from Pre-diabetes to Normal Glucose Regulation is Associated with Long-term Reduction in Diabetes Risk: Results from the Diabetes Prevention Program Outcomes Study. *Lancet*. 2012;379(9833):2243-2251.
45. Mason C, Foster-Schubert KE, Imayama I, et al. Dietary Weight Loss and Exercise Effects on Insulin Resistance in Postmenopausal Women. *American Journal of Preventive Medicine*. 41(4):366-375.
46. Lindstrom J, Ilanne-Parikka P, Peltonen M, et al. Sustained reduction in the incidence of type 2 diabetes by lifestyle intervention: follow-up of the Finnish Diabetes Prevention Study. *Lancet*. 2006;368(9548):1673-1679.
47. Ebbesson SO, Ebbesson LO, Swenson M, Kennish JM, Robbins DC. A successful diabetes prevention study in Eskimos: the Alaska Siberia project. *Int J Circumpolar Health*. 2005;64(4):409-424.
48. The Diabetes Prevention Program Research Group. Prevention of Type 2 Diabetes With Troglitazone in the Diabetes Prevention Program. *Diabetes*. 2005;54(4):1150-1156.

49. Lindstrom J, Louheranta A, Mannelin M, et al. The Finnish Diabetes Prevention Study (DPS): Lifestyle intervention and 3-year results on diet and physical activity. *Diabetes Care*. 2003;26(12):3230-3236.
50. Lindström J, Eriksson JG, Valle TT, et al. Prevention of Diabetes Mellitus in Subjects with Impaired Glucose Tolerance in the Finnish Diabetes Prevention Study: Results From a Randomized Clinical Trial. *Journal of the American Society of Nephrology*. 2003;14(suppl 2):S108-S113.
51. Li G, Hu Y, Yang W, et al. Effects of insulin resistance and insulin secretion on the efficacy of interventions to retard development of type 2 diabetes mellitus: the DA Qing IGT and Diabetes Study. *Diabetes Research and Clinical Practice*. 2002;58(3):193-200.
52. Oldroyd JC, Unwin NC, White M, Imrie K, Mathers JC, Alberti KG. Randomised controlled trial evaluating the effectiveness of behavioural interventions to modify cardiovascular risk factors in men and women with impaired glucose tolerance: outcomes at 6 months. *Diabetes Research and Clinical Practice*. 2001;52(1):29-43.
53. Rosenstock J, Klaff LJ, Schwartz S, et al. Effects of exenatide and lifestyle modification on body weight and glucose tolerance in obese subjects with and without pre-diabetes. *Diabetes Care*. 2010;33(6):1173-1175.

**eFigure 1. Meta-Regression Examining the Influence of Weight Lost on Diabetes Risk Among Studies Reporting This Outcome (N=24).**

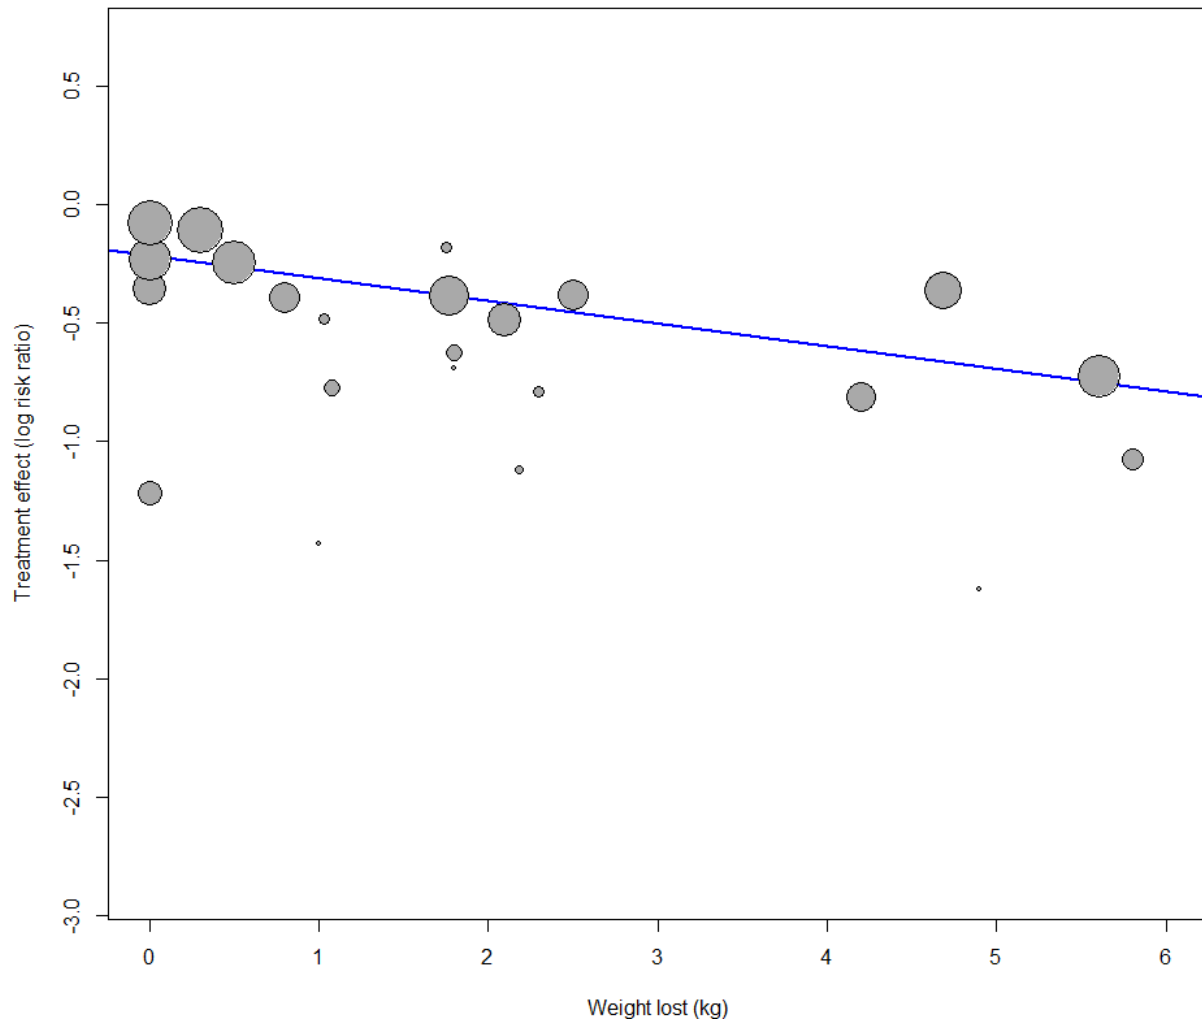

A meta-regression including participant mean age, proportion of male participants and weight lost in kilograms as predictors of diabetes risk explained 59% of effect heterogeneity ( $p < 0.01$ ). The model shows that every kilogram of weight lost is associated with a 7% decrease in diabetes risk ( $\beta = -0.07$ ,  $p < 0.01$ ), while age ( $\beta = 0.008$ ,  $p = 0.64$ ) and gender ( $\beta = 0.003$ ,  $p = 0.61$ ) did not have an influence.



**eFigure 2. Funnel Plot Exploring Publication Bias**

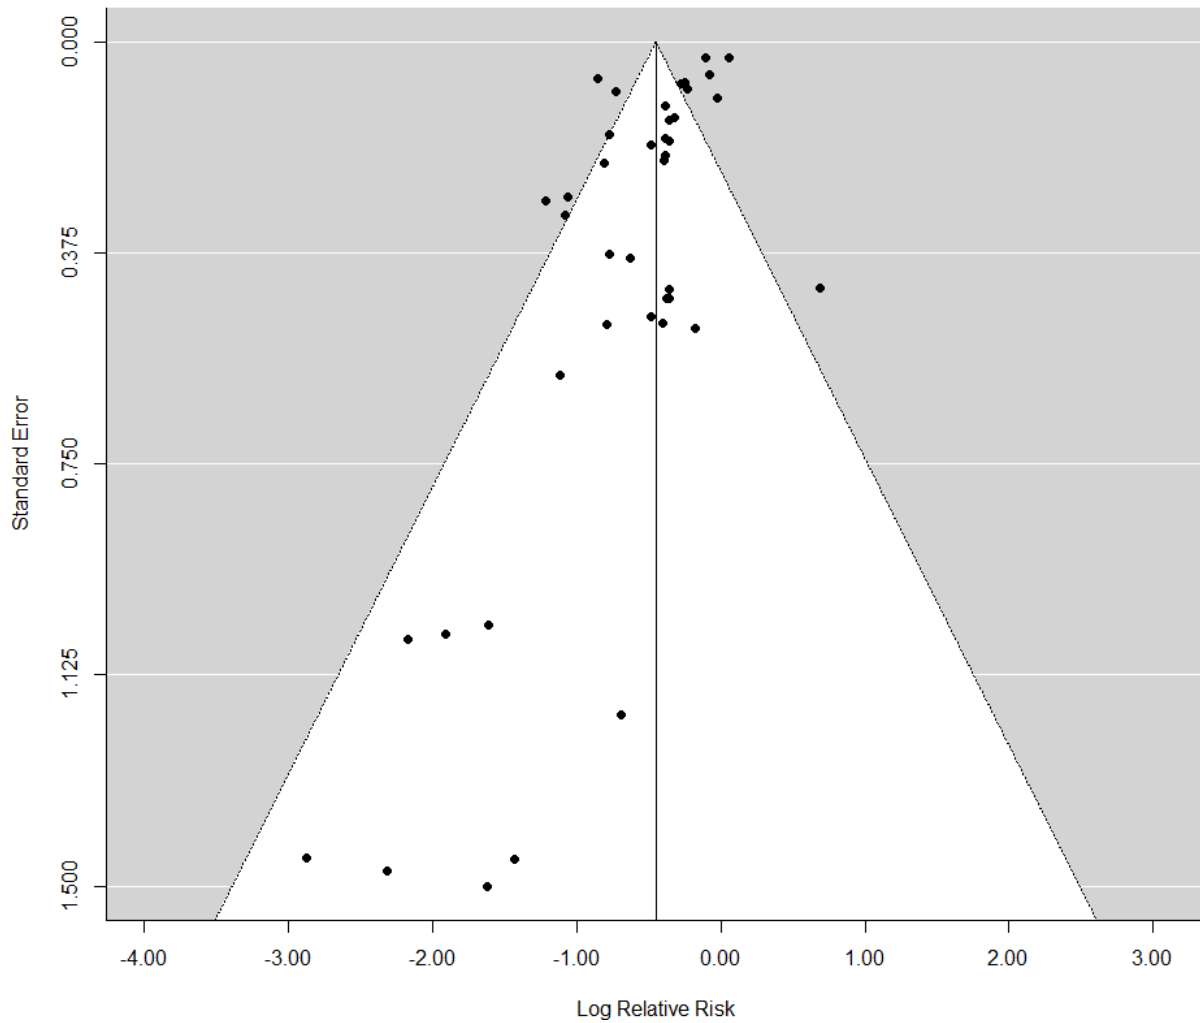

\*Funnel plot examining publication bias. Each dot represents a study arm ( $N=40$ ) plotted according to their effect (x axis) and their standard error (y axis). The asymmetrical plot indicates that smaller studies with null effects are less likely to be published (right side of the funnel) than studies with positive effects (left side of the funnel;  $t = -4.1$ ,  $df = 39$ ,  $p < 0.001$ ).
